# Supplementary material for: Multi-Source Agent-Based Modeling to Optimize Influenza Mitigation Strategies in Hong Kong
Source: Research Square preprint supplement (doi:10.21203/rs.3.rs-7574768/v1), 2025-09-24
Supplement: Supplementary file 1 [file 5fc6a82efb45c777006d2307.docx]

**Supplementary Material**

**for ‘Multi-Source Agent-Based Modeling to Optimize Influenza Mitigation Strategies in Hong Kong’**

Contents

[SUPPLEMENTARY METHODS 3](#_Toc205987622)

[1. Covasim model overview 3](#_Toc205987623)

[2. Adaptation Covasim for influenza dynamic 3](#_Toc205987624)

[2.1 Population and contact networks 3](#_Toc205987625)

[2.2 Simplification of disease states 4](#_Toc205987626)

[2.3 Disease progression 4](#_Toc205987627)

[2.4 Symptomatic and asymptomatic cases 4](#_Toc205987628)

[2.5 Transmission parameters and viral load dynamic 4](#_Toc205987629)

[2.6 Immunity 5](#_Toc205987630)

[2.7 Seasonal variability 6](#_Toc205987631)

[2.8 Impact of summer holidays 6](#_Toc205987632)

[3. Calibration 6](#_Toc205987633)

[4. Intervention strategy 7](#_Toc205987634)

[4.1 Vaccination strategies 7](#_Toc205987635)

[4.2 Staying home when sick strategies 7](#_Toc205987636)

[4.3 Mask-wearing strategies 8](#_Toc205987637)

[4.4 School closure strategies 8](#_Toc205987638)

[SUPPLEMENTARY RESULTS 9](#_Toc205987639)

[Sensitivity analysis: Age group-targeted vaccination 9](#_Toc205987640)

[Sensitivity analysis: Non-pharmaceutical interventions (NPIs) 9](#_Toc205987641)

[Sensitivity analysis: Combination strategies during mismatched seasons 10](#_Toc205987642)

[Sensitivity analysis: Strategies for school-aged children 10](#_Toc205987643)

[SUPPLEMENTARY TABLES 12](#_Toc205987644)

[Supplementary Table 1. Summary of model parameters 12](#_Toc205987645)

[Supplementary Table 2. Population and contact networks data 18](#_Toc205987646)

[Supplementary Table 3. Baseline vaccination coverage by age group and season 20](#_Toc205987647)

[Supplementary Table 4. Implementation date of interventions 21](#_Toc205987648)

[SUPPLEMENTARY FIGURES 22](#_Toc205987649)

[SUPPLEMENTARY REFERENCES 25](#_Toc205987650)

# SUPPLEMENTARY METHODS

## 1. Covasim model overview

Covasim is an open-source, agent-based model initially developed to simulate SARS-CoV-2 transmission. It represents individuals as agents within interconnected social networks—including households, schools, workplaces, and communities—and simulates key epidemiological processes such as transmission, disease progression, and the effects of interventions. Covasim supports modeling of both non-pharmaceutical interventions (NPIs) and vaccination strategies, offering a flexible and up-to-date framework adaptable to various infectious diseases beyond COVID-19.

We selected Covasim for this study based on several factors: the similar respiratory transmission mechanisms of influenza and coronaviruses, their shared responsiveness to comparable interventions, and Covasim’s sophisticated contact-network architecture that enables precise simulation of targeted control measures. Furthermore, repurpo sing a validated, flexible model like Covasim represents an efficient and innovative approach to modeling increasingly complex respiratory disease dynamics across diverse populations.

## 2. Adaptation Covasim for influenza dynamic

To model influenza dynamics in Hong Kong, we adapted Covasim (v3.1.4) to capture key features of seasonal influenza in this subtropical setting. Modifications were made to core components, including population structure, contact networks, disease progression, transmission parameters, and seasonal variability. Details of these adjustments are provided below; parameter values are summarized in Supplementary Table 1.

### 2.1 Population and contact networks

Four contact layers—households, schools, workplaces, and community—were included to capture key settings of influenza transmission. We used local demographic and social data to reflect Hong Kong’s population structure and mixing patterns. Age-stratified population data were obtained from the Hong Kong Government; employment data from the Census and Statistics Department; and school enrolment statistics from the Education Bureau and University Grants Committee. These inputs informed the construction of realistic contact networks using SynthPops, an open-source tool that generates synthetic populations based on demographic distributions.

Further data sources are detailed in Supplementary Table 2. The model code and technical documentation are available at <https://github.com/Liping-Peng/Influenza_ABM_HK>.

### 2.2 Simplification of disease states

Given the focus on transmission rather than clinical outcomes, we simplified the disease states to five compartments: susceptible, exposed, symptomatic, asymptomatic, and recovered. Hospitalization and death were excluded due to the low severity and mortality of seasonal influenza in Hong Kong. We also assumed no reinfection within a single season.

### 2.3 Disease progression

To reflect key differences between influenza and SARS-CoV-2, we adjusted disease progression and transmission parameters. The incubation and latent periods were both set to 1.9 days, representing the average time from exposure to infectiousness. The infectious period for symptomatic and asymptomatic cases was set to 6 days.

### 2.4 Symptomatic and asymptomatic cases

We assumed that 80% of infections result in symptomatic illness, with the remaining 20% remaining asymptomatic. Asymptomatic individuals were assumed to be 50% as infectious as symptomatic cases.

### 2.5 Transmission parameters and viral load dynamic

(1) Age-specific transmissibility and susceptibility

Transmission probabilities and susceptibility were age-stratified. Children under 12 were assumed to be twice as infectious as other age groups, reflecting their higher transmission potential during influenza outbreaks. Age-specific susceptibility was calibrated using empirical epidemiological data.

(2) Layer-specific transmission probabilities

Relative transmission probabilities were assigned by contact setting:

- Households: 2.0 (close, prolonged contact)
- Schools and workplaces: 0.6 (moderate contact intensity)
- Community settings: 0.3 (transient, lower-intensity contact)

(3) Time-varying transmissibility

Individual infectiousness varied over time according to viral load dynamics. The initial 40% of the infectious period (approximately 3 days), capped at 4 days, was defined as the high viral load phase. During this period, individuals were assumed to be twice as infectious as in the subsequent low viral load phase, with a viral load ratio of 2.

### 2.6 Immunity

(1) Pre-epidemic immunity

Pre-existing immunity was estimated using hemagglutination-inhibition (HAI) antibody titers [ref]. Based on titer levels (0–9), a proportion of the population was assigned partial protection, ranging from 0% to 88% 1.

(2) Vaccine-induced immunity

Vaccine efficacy was set at 70% in matched seasons and 30% in mismatched seasons. Immunity was assumed to build over 14 days post-vaccination, then wane at a rate of 14% per year 1.

(3) Infection-induced immunity

Individuals infected within a season were assumed to develop full immunity against reinfection for the remainder of that season. Immunity was modeled to peak 14 days post-infection and remain at 100% thereafter.

### 2.7 Seasonal variability

To account for the seasonal fluctuations in influenza transmission, particularly in subtropical regions like Hong Kong, we incorporated seasonal variability into the model using sine/cosine functions. These functions were customized for each season, allowing the transmission rate to vary over time in a way that mirrors observed real-world patterns of seasonal influenza.

### 2.8 Impact of summer holidays

To reflect reduced school-based transmission during summer holidays, per-contact transmission probabilities within school networks were reduced by 80% from July 15 to August 31, corresponding to the period when schools are closed.

## 3. Calibration

We calibrated the model using the Optuna (v3.2.0) hyperparameter optimization framework, running 40,000 simulations per season. The 30 best-fitting parameter sets, based on mean squared error (MSE) minimization, were selected for scenario analyses (Supplementary Fig. 1).

Calibration targeted three data sources with differential weighting:

- Cumulative daily infections (weight = 1)
- Age-specific new infections (weighted by observed age distribution)
- Influenza-related school absences in children aged 6–18 (weight = 0.1)

For seasons 1–3, the full absenteeism time series was used. For seasons 4–6, only mid- and post-peak data were included to avoid bias from abnormally high early-season absenteeism.

## 4. Intervention strategy

### 4.1 Vaccination strategies

We evaluated age-specific vaccination strategies using Covasim’s “vaccinate_prob” function. Baseline coverage ranged from 2.7% to 32.8% across age groups (Supplementary Table 3), based on official data. To assess the impact of expanded coverage, we incrementally increased vaccination rates by 10% above baseline in each scenario.

### 4.2 Staying home when sick strategies

The staying home when sick targeted symptomatic individuals who sought healthcare and voluntarily refrained from attending work or school due to illness. We implemented this strategy using Covasim’s “test_prob” function, applying it only to symptomatic cases. A one-day delay was assumed between symptom onset and the start of stay-at-home behavior, which was maintained until recovery.

The stay-at-home intervention was modeled through several key components:

1. **Symptomatic probability ():** Set to 80% in primary analysis, reflecting the likelihood of symptom development.
2. **Healthcare-seeking probability ():** Age-specific daily probability of seeking care: 18.1% (ages 0-15), 6.5% (16-54), and 9.5% (≥55), corresponding to cumulative care-seeking probabilities per infection of 69.9%, 33.2%, and 44.9%, respectively.
3. **Adherence to staying home ():** Daily probability of adhering to staying home after seeking care; calibrated from observed data.
4. **Recovery time** (): Mean duration from symptom onset to recovery is six days, with a one-day assumed delay between symptom onset and initiation of stay-at-home behaviour.

The overall daily probability of staying home () for age group *i* was:

Staying home when sick was assumed to reduce transmission by 80% in school, workplace, and community settings, but not within households, where contact continued during the stay-at-home period.

### 4.3 Mask-wearing strategies

Mask-wearing was modeled as a population-level intervention reducing transmission in schools, workplaces, and community settings via Covasim’s “change_beta” function, which adjusts per-contact transmission probabilities (β) by social layer.

In the baseline scenario, 10% mask usage was assumed 2, with 50% mask efficacy and 50% compliance 3,4, yielding a 2.5% reduction in β (10% × 50% × 50%) in relevant settings. No reduction was applied within households or school settings during summer holidays when schools were closed. Scenario analyses explored increased mask coverage by increments of 10%.

### 4.4 School closure strategies

School closures were simulated by reducing per-contact transmission probabilities within the school layer using Covasim’s “change_beta” function. No compensatory increases in contacts in other social layers were assumed for school-aged children during scheduled or reactive closures.

# SUPPLEMENTARY RESULTS

### Sensitivity analysis: Age group-targeted vaccination

We evaluated the robustness of age-targeted vaccination strategies under varying assumptions of age-specific transmissibility. The main analysis assumed children under 12 had twice the transmissibility of other age groups. The lower bound assumed uniform transmissibility across ages, while the upper bound increased children’s transmissibility to three times that of others.

Across all six seasons, vaccinating children under 12 consistently yielded the greatest reductions in population-level attack rates, with absolute reductions ranging from 0.31 to 1.03 percentage points per 100,000 vaccinated in the lower bound (Supplementary Fig. 6 and 10), and 0.68 to 3.29 in the upper bound scenario (Supplementary Fig. 14 and 18). Vaccination of adults aged ≥65 produced smaller absolute reductions: 0.08–1.05 percentage points (lower bound) and 0.19–0.87 percentage points (upper bound). In both scenarios, vaccinating children under 12 conferred indirect protection across age groups, whereas targeting older adults yielded limited indirect effects, especially among those under 18. Notably, no significant reduction was observed in the under-18 group in three seasons under both lower-bond (Supplementary Fig. 11) and upper-bond scenarios (Supplementary Fig. 19).

### Sensitivity analysis: Non-pharmaceutical interventions (NPIs)

We evaluated the impact of NPIs under varying efficacy assumptions. In the main analysis, staying home when sick and mask use were assumed to reduce transmission by 80% and 50%, respectively. Lower-bound scenarios reduced these values to 70% and 40%, while upper-bound scenarios increased them to 90% and 60%.

In the lower-bound scenario, increasing daily adherence to staying home when sick by 10%–50% resulted in 5.8%–15.5% of symptomatic individuals staying home, reducing attack rates by 0%–30% across six seasons (Supplementary Fig. 7). In the upper-bound scenario, overall adherence rose to 9.6%–30.8%, yielding a 5%–66% reduction in attack rates (Supplementary Fig. 15). Increasing mask use by 10%–50% (i.e., 20%–60% coverage) reduced attack rates by 3%–49% under the lower bound and by 7%–71% under the upper bound.

### Sensitivity analysis: Combination strategies during mismatched seasons

In Seasons 1 and 4, a 50% increase in daily adherence to staying home when sick reduced attack rates by 11%–15% in the lower bound (with 14%–19% of symptomatic individuals staying home; Supplementary Fig. 8) and by around 65% in the upper bound (29%–40% staying home; Supplementary Fig. 16). When two interventions were jointly increased by 10%–50%, attack rates declined by 13%–72% (Season 1) and 14%–62% (Season 4) in the lower bound, and by 28%–91% and 27%–87% in the upper bound, respectively.

### Sensitivity analysis: Strategies for school-aged children

We evaluated the impact of school-based interventions under varying assumptions about transmissibility among children under 12.

In the lower bound scenario, increasing school closure coverage from 10% to 50% reduced student attack rates by 29%, 19%, and 31%, and overall attack rates by 18%, 19%, and 20% in Seasons 3 to 5. The same increase in student vaccination coverage yielded larger reductions—63%, 36%, and 71% among students, and 43%, 20%, and 55% overall. Increasing the proportion of symptomatic students staying home from 10% to 50% led to student attack rate reductions of 13%, 24%, and 27%, and overall reductions of 4%, 13%, and 17% (Supplementary Fig. 9).

In the upper bound scenario, school closures reduced student attack rates by 34%, 18%, and 36%, and overall rates by 28%, 24%, and 27%. Student vaccination remained more effective, reducing student attack rates by 80%, 45%, and 87%, and overall rates by 67%, 28%, and 74%. Increasing the proportion of staying home when sick yielded student-level reductions of 31%, 64%, and 58%, and overall reductions of 24%, 57%, and 51% (Supplementary Fig. 17).

# SUPPLEMENTARY TABLES

### Supplementary Table 1. Summary of model parameters

| Parameter type | Description | Parameter name | Value | Lower bound | Upper bound | Source |
| --- | --- | --- | --- | --- | --- | --- |
| Progression of disease | Duration from exposure to infectiousness onset | exp2inf | Lognormal distribution with mean = 1.9 days, SD = 0.2 days (on original scale) | mean = 1.4 days, SD = 0.38 days | mean = 2.5 days, SD = 0.38 days | 5 |
|  | Duration from infectiousness onset to symptom onset | inf2sym | 0 | - | - | Assumption: latent period was equivalent to the incubation period |
|  | Recovery time for symptomatic cases | mild2rec | Lognormal distribution with mean = 6.0 days, SD = 1.02 days (on original scale) | mean = 5.0 days, SD = 1.02 days | mean = 7.0 days, SD = 1.02 days | 6 |
|  | Recovery time for asymptomatic cases | asym2rec | Lognormal distribution with mean = 6.0 days, SD = 1.02 days (on original scale) | mean = 5.0 days, SD = 1.02 days | mean = 7.0 days, SD = 1.02 days | Assumption: same parameter values as symptomatic cases |
| Transmission parameters | Odds ratios for relative for transmissibility | trans_ORs | Age group specific:  0-11: 2.0  12-24: 1.0  25-44: 1.0  45-64: 1.0  >=65: 1.0 | Age group specific:  0-11: 1.0  12-24: 1.0  25-44: 1.0  45-64: 1.0  >=65: 1.0 | Age group specific:  0-11: 3.0  12-24: 1.0  25-44: 1.0  45-64: 1.0  >=65: 1.0 | 7,8 |
|  | Probability of developing symptoms | symp_probs () | 80% | 70% | 90% | 9,10 |
|  | Relative infectiousness of asymptomatic cases | asymp_factor | 50% | 40% | 60% | 10,11 |
|  | Time-varying transmissibility: high viral load during early phase of infection (includes frac_time, load_ratio, high_cap) | viral_dist | frac_time=0.4, load_ratio=2, high_cap=4 | - | - | 12,13 |
| Contact layer-specific parameters | Weights of transmission probability | beta_layer | H: 2.0  S: 0.5  W: 0.5  C: 0.2 | H: 2.0  S: 0.4  W: 0.4  C: 0.1 | H: 2.0  S: 0.6  W: 0.6  C: 0.3 | 14 |
|  | Number of contacts per person per day | contacts | H: 2  S: 18  W: 16  C: 20 | H: 2  S: 16  W: 16  C: 18 | H: 3  S: 20  W: 20  C: 22 | H: average household size of 2.9 in Table 4.1 15.  S and W: mean contacts of 18 16.  C: assumed |
| Baseline intervention-related parameters | Vaccination coverage |  | Ranging from 2.7% to 32.8% across age groups and seasons (refer to Supplementary Table 3) | - | - | 17,18 |
|  | Vaccination efficacy |  | Antigenically-matched seasons: 70%  Antigenically-mismatched seasons: 30% |  |  | 19 |
|  | Daily probability that a symptomatic individual in age group seeks healthcare |  | ≤15: 18.1%  16-54: 6.5%  ≥55: 9.5%  (corresponding cumulative probabilities: 69.9%, 33.2%, 44.9%) | ≤15: 14.1%  16-54: 4.3%  ≥55: 6.9%  (corresponding cumulative probabilities: 59.9%, 23.2%, 34.9%) | ≤15: 23.5%  16-54: 9.0%  ≥55: 12.4%  (corresponding cumulative probabilities: 79.9%, 43.2%, 54.9%) | 20 |
|  | Daily probability that an asymptomatic individual seeks healthcare |  | 0 | - | - | Assumption |
|  | Efficacy of staying home when sick |  | 80% | 70% | 90% | Assumption |
|  | Mask coverage |  | 10% | 5% | 15% | 2 |
|  | Efficacy of mask-wearing |  | 50% | 40% | 60% | 3,4 |
|  | Adherence to mask-wearing |  | 50% | 40% | 60% | 3,4 |
|  | School closure coverage |  | 0% | - | - | Assume no school closure at baseline. |
|  | Efficacy of school closure |  | 100% | - | - | Assumption |
| Calibrated parameters  (median values derived from the top 30 fitting parameter) | Per-contact transmission probability | β | | Season1: 0.0094  Season2: 0.0112  Season3: 0.0108  Season4: 0.0084  Season5: 0.0092  Season6: 0.0115 | | --- | |  | | Season1: 0.0158  Season2: 0.0187  Season3: 0.0212  Season4: 0.0161  Season5: 0.0166  Season6: 0.0194 | Season1: 0.0062  Season2: 0.0079  Season3: 0.0073  Season4: 0.0056  Season5: 0.0055  Season6: 0.0082 | Calibrated |
|  | Number of initial infections | pop_infected | Season1: 10058  Season2: 532  Season3: 728  Season4: 17355  Season5: 1744  Season6: 1034 | Season1: 5973  Season2: 130  Season3: 129  Season4: 15848  Season5: 753  Season6: 595 | Season1: 14507  Season2: 1254  Season3: 1371  Season4: 15250  Season5: 3733  Season6: 762 | Calibrated |
|  | Age-specific odds ratios of relative susceptibility across different age groups | sus_OR_0_25 | Season1: 1.31  Season2: 0.73  Season3: 0.76  Season4: 0.85  Season5: 0.81  Season6: 0.61 | Season1: 1.71  Season2: 1.04  Season3: 0.79  Season4: 0.94  Season5: 0.94  Season6: 0.83 | Season1: 1.05  Season2: 0.51  Season3: 0.58  Season4: 0.68  Season5: 0.68  Season6: 0.47 | Calibrated |
|  |  | sus_OR_45_65 | Season1: 0.95  Season2: 1.45  Season3: 1.28  Season4: 1.38  Season5: 1.39  Season6: 0.92 | Season1: 1.00  Season2: 1.41  Season3: 1.10  Season4: 1.26  Season5: 1.37  Season6: 0.87 | Season1: 0.91  Season2: 1.38  Season3: 1.14  Season4: 1.23  Season5: 1.36  Season6: 0.83 |  |
|  |  | sus_OR_65 | Season1: 1.37  Season2: 3.06  Season3: 2.20  Season4: 2.88  Season5: 2.73  Season6: 1.42 | Season1: 1.88  Season2: 3.13  Season3: 2.36  Season4: 3.51  Season5: 3.12  Season6: 1.53 | Season1: 1.17  Season2: 2.44  Season3: 1.92  Season4: 2.26  Season5: 2.56  Season6: 1.23 |  |
|  | Daily probability of adherence to staying home when sick |  | Season1: 0.082  Season2: 0.035  Season3: 0.070  Season4: 0.035  Season5: 0.040  Season6: 0.062 | Season1: 0.110  Season2: 0.040  Season3: 0.190  Season4: 0.080  Season5: 0.084  Season6: 0.101 | Season1: 0.045  Season2: 0.019  Season3: 0.042  Season4: 0.015  Season5: 0.020  Season6: 0.038 | Calibrated |

**Note**:
H: Households; S: Schools; W: Workplaces; C: Community settings.

### Supplementary Table 2. Population and contact networks data

| Type | Data | Source |
| --- | --- | --- |
| Population | Age distribution | Census and Statistics Department. Table: Population by Sex and Age Group (https://www.censtatd.gov.hk/tc/web_table.html?id=110-01001) |
| Household | Household size distribution | Table 4.1 of https://www.census2021.gov.hk/doc/pub/21c-main-results.pdf |
|  | Household head age brackets | Data unavailable. Settings were based on assumptions. According to the conducted tests, it resulted in only minor impacts on the final contact networks. |
|  | Head of household age distribution by household size | Estimated based on Table 3.3 of https://www.censtatd.gov.hk/sc/wbr.html?ecode=B11303032023AN23&scode=180 |
| Workplace | Employment rates by age | Calculated based on Table: Labour force and labour force participation rate by age and sex of https://www.censtatd.gov.hk/en/web_table.html?id=210-06201# |
|  | Workplace size distribution | Data unavailable. Settings were based on data from Seattle. |
| School | Average class size | Student Enrolment Statistics, 2012/13.  Chart 10 and 12 of https://www.edb.gov.hk/attachment/en/about-edb/publications-stat/figures/Enrol_2012.pdf |
|  | Average student teacher ratio | Hong Kong Annual Digest of Statistics.  Section 12.14 of https://www.censtatd.gov.hk/en/data/stat_report/product/B1010003/att/B10100032012AN12B0100.pdf |
|  | Age ranges for different school types | Hong Kong Annual Digest of Statistics. Section 12.5 of https://www.censtatd.gov.hk/en/data/stat_report/product/B1010003/att/B10100032012AN12B0100.pdf |
|  | School size distribution | (1) Student Enrolment Statistics, 2012/13. Chart 2, 3, 4 of https://www.edb.gov.hk/attachment/en/about-edb/publications-stat/figures/Enrol_2012.pdf  (2) University 2012/2013 student number, ref: https://cdcf.ugc.edu.hk/cdcf/searchStatSiteReport.action# |
|  | School size distribution by type | (1) Student Enrolment Statistics, 2012/13. Chart 2, 3, 4 of https://www.edb.gov.hk/attachment/en/about-edb/publications-stat/figures/Enrol_2012.pdf  (2) University 2012/2013 student number, ref: https://cdcf.ugc.edu.hk/cdcf/searchStatSiteReport.action# |
|  | Enrollment rates by age | Census and Statistics Department. (https://www.bycensus2016.gov.hk/tc/Snapshot-02.html) |

### Supplementary Table 3. Baseline vaccination coverage by age group and season

| Season | 0_5 | 6_11 | 12_17 | 18_39 | 40_64 | >=65 |
| --- | --- | --- | --- | --- | --- | --- |
| 1 | 7.5% | 10.8% | 5.1% | 2.7% | 8.4% | 28.1% |
| 2 | 8.6% | 12.3% | 5.8% | 2.9% | 9.0% | 29.9% |
| 3 | 8.6% | 12.3% | 5.8% | 2.9% | 9.0% | 29.9% |
| 4 | 12.5% | 17.9% | 8.5% | 3.3% | 9.9% | 32.8% |
| 5 | 12.9% | 18.4% | 8.8% | 3.3% | 9.8% | 32.7% |
| 6 | 12.9% | 18.4% | 8.8% | 3.3% | 9.8% | 32.7% |

### Supplementary Table 4. Implementation date of interventions

| Season | Date of school summer holiday | Date of vaccination | Date of NPIs (staying home when sick and mask use) | Source |
| --- | --- | --- | --- | --- |
| 1 | Closure period begins in mid-June, followed by the summer holiday from July 15 to August 31. | At the beginning of the model (Days = 1) | 2009/06/27 | <https://www.chp.gov.hk/sc/features/17645.html> （2009-06-29）  <https://www.chp.gov.hk/sc/features/18020.html> （2009-07-27）  https://www.chp.gov.hk/sc/features/18127.html （2009-08-03）  <https://www.chp.gov.hk/files/pdf/letter_vigilance_against_influenza_seasion_in_summer_elderly_17062009c.pdf>  <https://www.ncbi.nlm.nih.gov/pmc/articles/PMC3206396/> (school closure before model start_date)  https://bmcinfectdis.biomedcentral.com/articles/10.1186/1471-2334-14-207(school closure before model start_date)  <https://search.fresh.gov.hk/chp/sc/search_result.php?q=%E5%8F%A3%E7%BD%A9&fq_yr=2009&fq_ct=&fq_ft=&sort=d&page=6> (Mask use before model start_date)  <https://ciaotest.cc.columbia.edu/wps/cntss/0020791/f_0020791_17297.pdf> (HK response to pH1N1: 3 phases) |
| 2 | July 15 - August 31 | 2010/07/29 | <https://www.dh.gov.hk/chs/press/2010/100729.html> |
| 3 | No summer holiday | 2011/01/17 | <https://www.dh.gov.hk/tc_chi/press/2011/110117-2.html> |
| 4 | No summer holiday | 2012/03/26 | <https://www.info.gov.hk/gia/general/201201/16/P201201160427.htm>  https://www.dh.gov.hk/chs/press/2012/120326-3.html |
| 5 | No summer holiday | 2013/02/04 | https://www.dh.gov.hk/chs/press/2013/130204.html |
| 6 | July 15 - August 31 | 2013/07/22 | https://www.dh.gov.hk/tc_chi/press/2013/130722-4.html |

# SUPPLEMENTARY FIGURES

**Figure S1**. Distribution of parameters for the top 30 calibrations.

Each panel corresponds to a specific parameter: relative susceptibility for age group 0–25 (first column), 45–65 (second column), and ≥65 years (third column); initial number of infections (fourth column); per-contact transmission probability (fifth column); and probability of adherence to staying home when sick (sixth column). The green lines denote the modal value, while the red lines indicate the mean value of the parameters.

**Figure S2**. Absolute (top) and relative (bottom) reductions in overall attack rate per 100,000 individuals vaccinated under age-targeted vaccination strategies.

**Figure S3**. Absolute (top) and relative (bottom) reductions in age-specific attack rates per 100,000 individuals vaccinated under age-targeted vaccination strategies.

Each row represents a different age-targeting strategy.

**Figure S4.** Impact of implementation delay on staying home when sick and mask use strategies.

Three implementation levels are shown for each strategy.

**Figure S5.** Sensitivity analysis (lower bound): Calibration results across six influenza seasons.

**Figure S6.** Sensitivity analysis (lower bound): Impact of age group-targeted vaccination strategies on attack rate.

**Figure S7.** Sensitivity analysis (lower bound): Impact of Non-Pharmaceutical Interventions (NPIs) strategies on attack rate.

**Figure S8.** Sensitivity analysis (lower bound): Impact of combination strategies for vaccine-mismatched seasons.

**Figure S9.** Sensitivity analysis (lower bound): Impact of interventions targeting school-age children.

**Figure S10**. Sensitivity analysis (lower bound): Absolute (top) and relative (bottom) reductions in overall attack rate per 100,000 individuals vaccinated under age-targeted vaccination strategies.

**Figure S11**. Absolute (top) and relative (bottom) reductions in age-specific attack rates per 100,000 individuals vaccinated under age-targeted vaccination strategies.

Each row represents a different age-targeting strategy.

**Figure S12.** Sensitivity analysis (lower bound): Impact of implementation delay on staying home when sick and mask use strategies.

Three implementation levels are shown for each strategy.

**Figure S13.** Sensitivity analysis (upper bound): Calibration results across six influenza seasons.

**Figure S14.** Sensitivity analysis (upper bound): Impact of age group-targeted vaccination strategies on attack rate.

**Figure S15.** Sensitivity analysis (upper bound): Impact of Non-Pharmaceutical Interventions (NPIs) strategies on attack rate.

**Figure S16.** Sensitivity analysis (upper bound): Impact of combination strategies for vaccine-mismatched seasons.

**Figure S17.** Sensitivity analysis (upper bound): Impact of interventions targeting school-age children.

**Figure S18**. Sensitivity analysis (upper bound): Absolute (top) and relative (bottom) reductions in overall attack rate per 100,000 individuals vaccinated under age-targeted vaccination strategies.

**Figure S19**. Absolute (top) and relative (bottom) reductions in age-specific attack rates per 100,000 individuals vaccinated under age-targeted vaccination strategies.

Each row represents a different age-targeting strategy.

**Figure S20.** Sensitivity analysis (upper bound): Impact of implementation delay on staying home when sick and mask use strategies.

Three implementation levels are shown for each strategy.

# SUPPLEMENTARY REFERENCES

1 Tsang, T. K. *et al.* Reconstructing antibody dynamics to estimate the risk of influenza virus infection. *Nat Commun* **13**, 1557, doi:10.1038/s41467-022-29310-8 (2022).

2 Lau, J. T., Griffiths, S., Choi, K. C. & Lin, C. Prevalence of preventive behaviors and associated factors during early phase of the H1N1 influenza epidemic. *Am J Infect Control* **38**, 374-380, doi:10.1016/j.ajic.2010.03.002 (2010).

3 Wan, Y. & Jeffrey, S. Reconciling the efficacy and effectiveness of masking on epidemic outcomes. *medRxiv*, 2023.2005.2010.23289803, doi:10.1101/2023.05.10.23289803 (2023).

4 Xiong, W., Cowling, B. J. & Tsang, T. K. Influenza Resurgence after Relaxation of Public Health and Social Measures, Hong Kong, 2023. *Emerg Infect Dis* **29**, 2556-2559, doi:10.3201/eid2912.230937 (2023).

5 Lessler, J. *et al.* Incubation periods of acute respiratory viral infections: a systematic review. *The Lancet Infectious Diseases* **9**, 291-300, doi:10.1016/S1473-3099(09)70069-6 (2009).

6 Lessler, J., Reich, N. G. & Cummings, D. A. T. Outbreak of 2009 Pandemic Influenza A (H1N1) at a New York City School. *New England Journal of Medicine* **361**, 2628-2636, doi:10.1056/NEJMoa0906089 (2009).

7 Hsieh, Y. H. Age groups and spread of influenza: implications for vaccination strategy. *BMC Infect Dis* **10**, 106, doi:10.1186/1471-2334-10-106 (2010).

8 Viboud, C. *et al.* Risk factors of influenza transmission in households. *Br J Gen Pract* **54**, 684-689 (2004).

9 Leung, N. H., Xu, C., Ip, D. K. & Cowling, B. J. Review Article: The Fraction of Influenza Virus Infections That Are Asymptomatic: A Systematic Review and Meta-analysis. *Epidemiology* **26**, 862-872, doi:10.1097/EDE.0000000000000340 (2015).

10 Montgomery, M. P. *et al.* The role of asymptomatic infections in influenza transmission: what do we really know. *Lancet Infect Dis* **24**, e394-e404, doi:10.1016/S1473-3099(23)00619-9 (2024).

11 Williams, K. V. *et al.* Influenza Vaccination, Household Composition, and Race-Based Differences in Influenza Incidence: An Agent-Based Modeling Study. *Am J Public Health* **115**, 209-216, doi:10.2105/AJPH.2024.307878 (2025).

12 Lau, L. L. *et al.* Viral shedding and clinical illness in naturally acquired influenza virus infections. *J Infect Dis* **201**, 1509-1516, doi:10.1086/652241 (2010).

13 Tsang, T. K. *et al.* Influenza A Virus Shedding and Infectivity in Households. *J Infect Dis* **212**, 1420-1428, doi:10.1093/infdis/jiv225 (2015).

14 Zhang, J. *et al.* Changes in contact patterns shape the dynamics of the COVID-19 outbreak in China. *Science* **368**, 1481-1486, doi:10.1126/science.abb8001 (2020).

15 Region, C. a. S. D. o. T. G. o. t. H. K. S. A. *The 2021 Population Census*, <<https://www.census2021.gov.hk/doc/pub/21c-main-results.pdf>> (2021).

16 Kucharski, A. J. *et al.* The contribution of social behaviour to the transmission of influenza A in a human population. *PLoS Pathog* **10**, e1004206, doi:10.1371/journal.ppat.1004206 (2014).

17 Wong, W. A.-O., Peare, S., Lam, H. Y., Chow, C. A.-O. & Lau, Y. A.-O. The estimated age-group specific influenza vaccine coverage rates in Hong Kong and the impact of the school outreach vaccination program.

18 Center of Health Protection of The Government of the Hong Kong Special Administrative Region. *Statistics on Vaccination Programmes in the Past 3 years*, <<https://www.chp.gov.hk/en/features/102226.html>> (2025).

19 Orrico-Sánchez, A., Valls-Arévalo, Á., Garcés-Sánchez, M., Álvarez Aldeán, J. & Ortiz de Lejarazu Leonardo, R. Efficacy and effectiveness of influenza vaccination in healthy children. A review of current evidence. *Enfermedades Infecciosas y Microbiología Clínica* **41**, 396-406, doi:<https://doi.org/10.1016/j.eimc.2022.02.005> (2023).

20 Zhang, Q. *et al.* A population-based study on healthcare-seeking behaviour of persons with symptoms of respiratory and gastrointestinal-related infections in Hong Kong. *BMC Public Health* **20**, 402, doi:10.1186/s12889-020-08555-2 (2020).
