# Supplementary figures and images for: Multi-Source Agent-Based Modeling to Optimize Influenza Mitigation Strategies in Hong Kong
Source: Research Square preprint supplement (doi:10.21203/rs.3.rs-7574768/v1), 2025-09-24

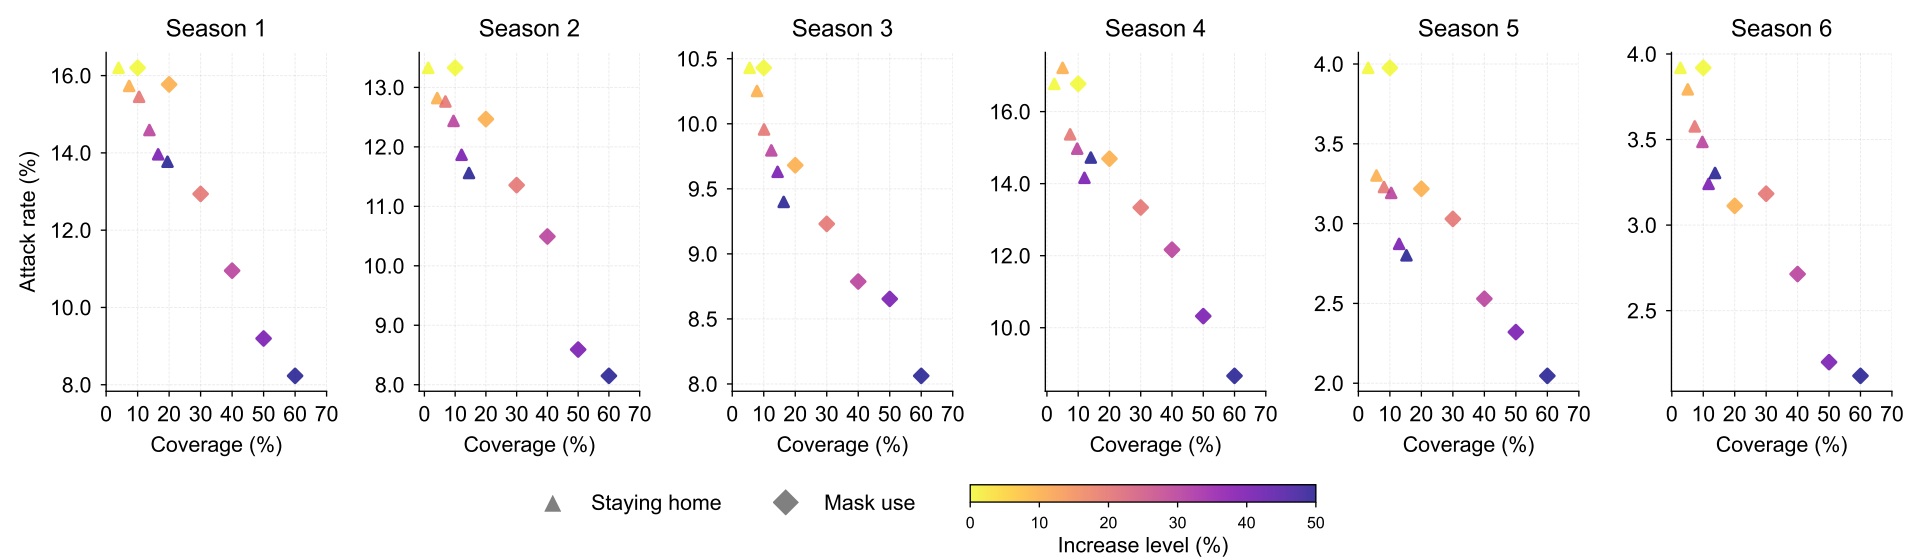

Supplement: Supplementary file 1 [file 0bf46ae10fdf2a47fbfef809.pdf]

**(A) Absolute reduction in AR (% , per 100,000 vaccinations)**

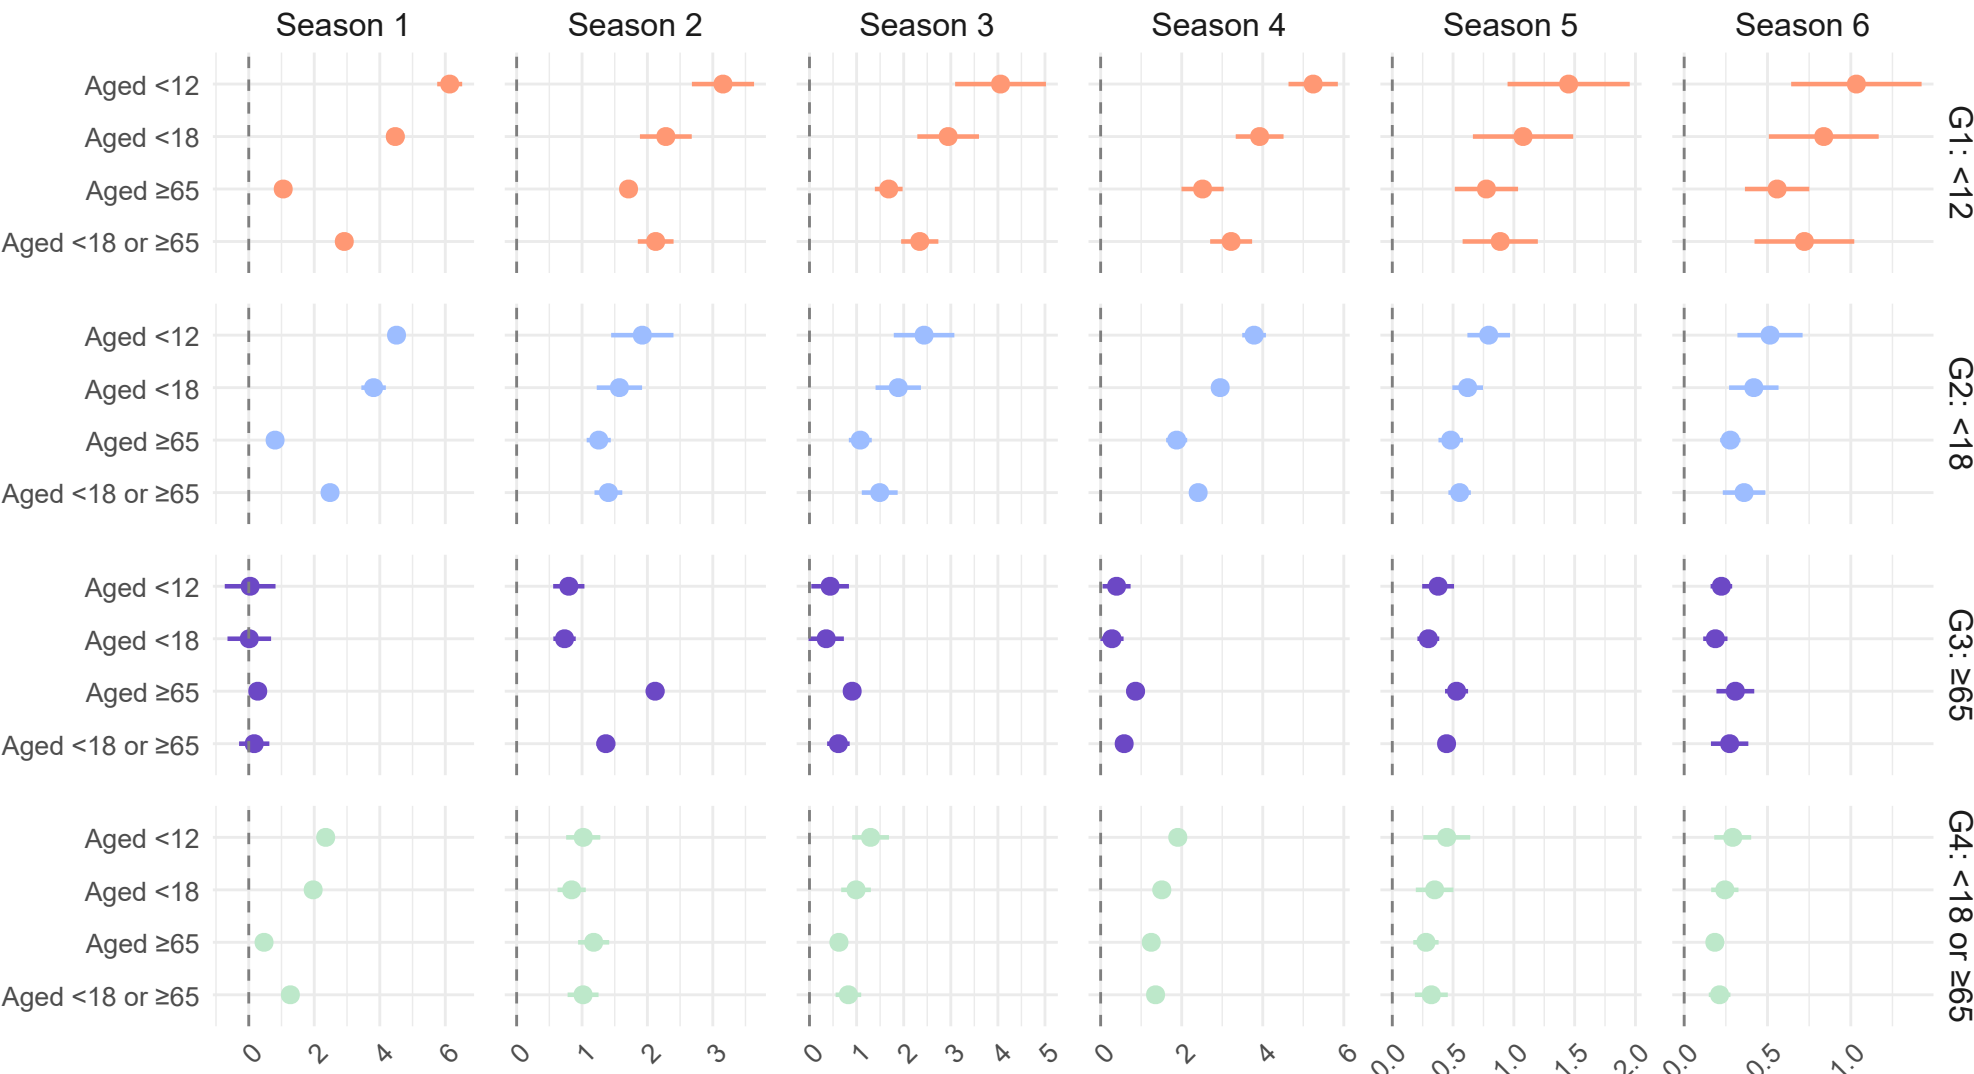

**(B) Relative reduction in AR (% , per 100,000 vaccinations)**

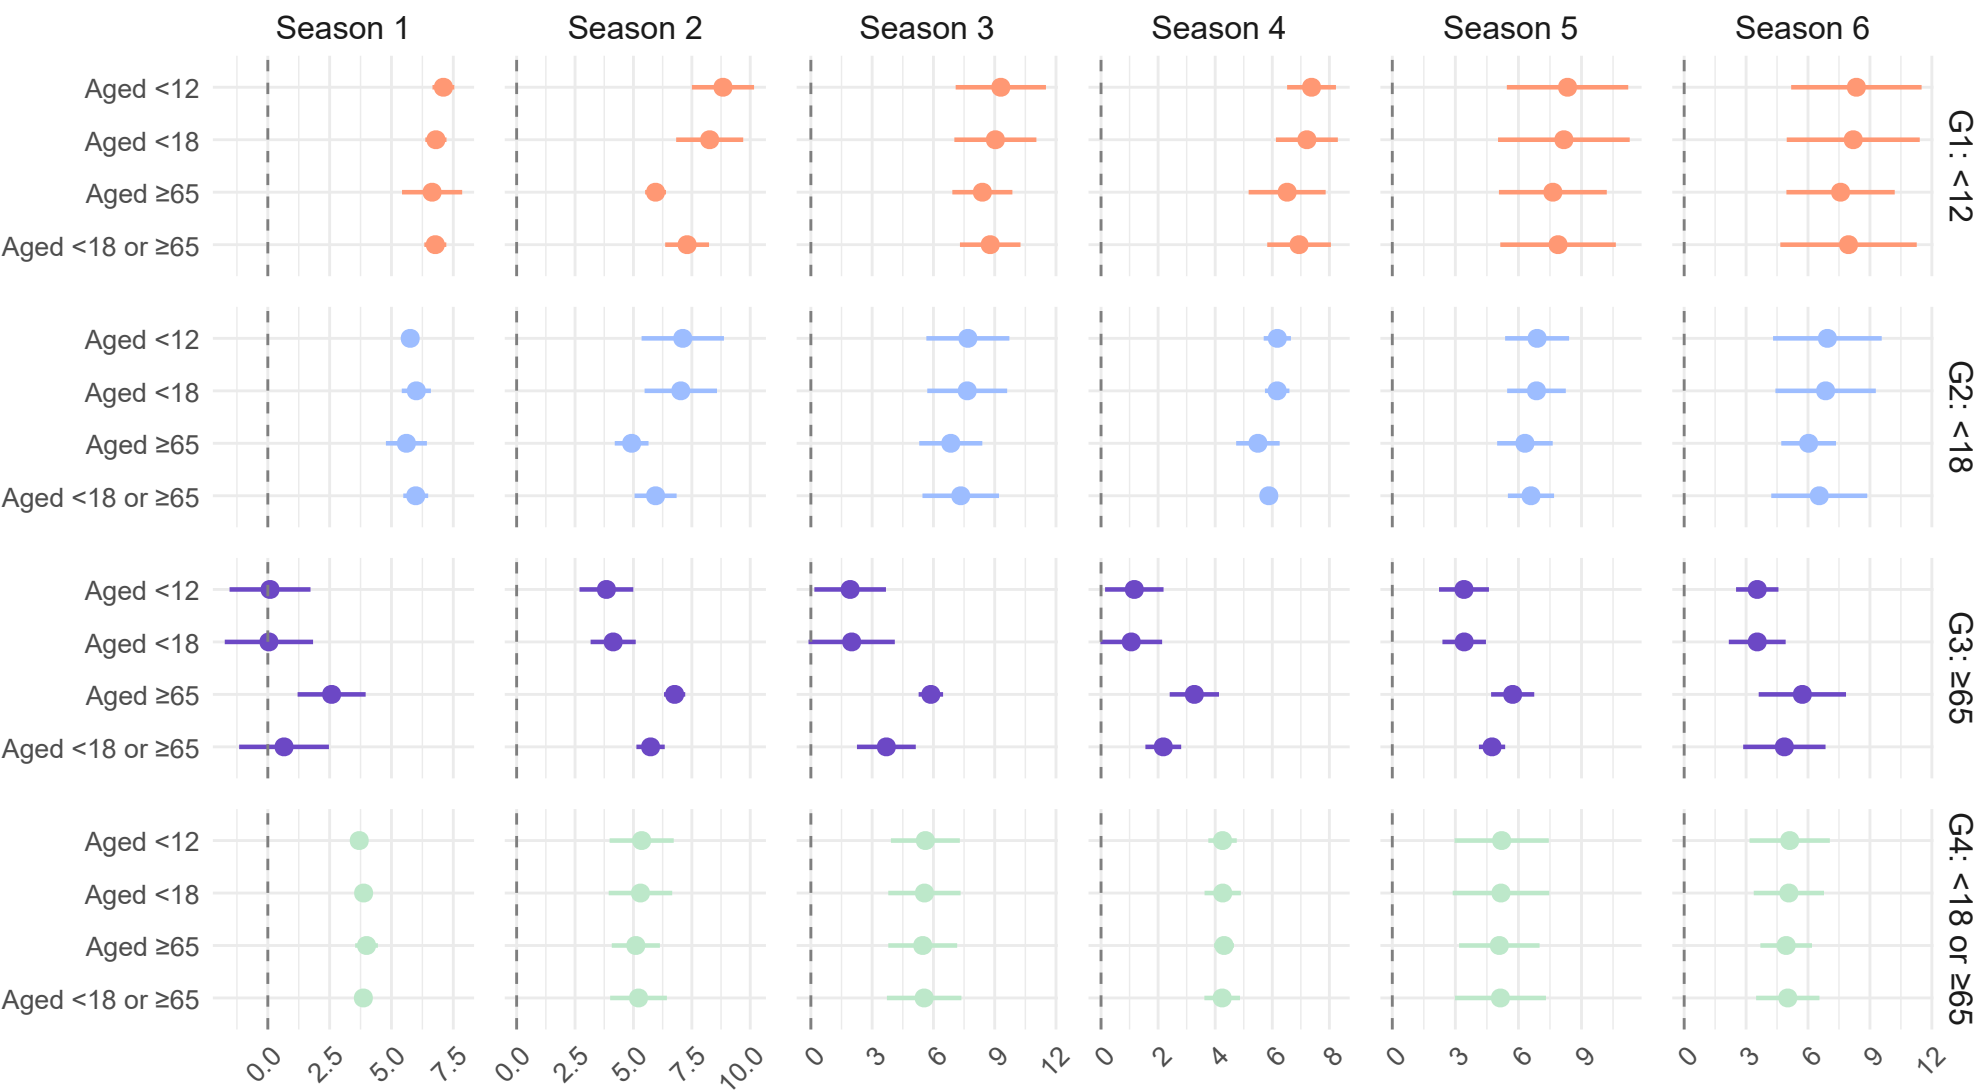

Supplement: Supplementary file 2 [file 27c8483da4a8be4ead9a4e7e.pdf]

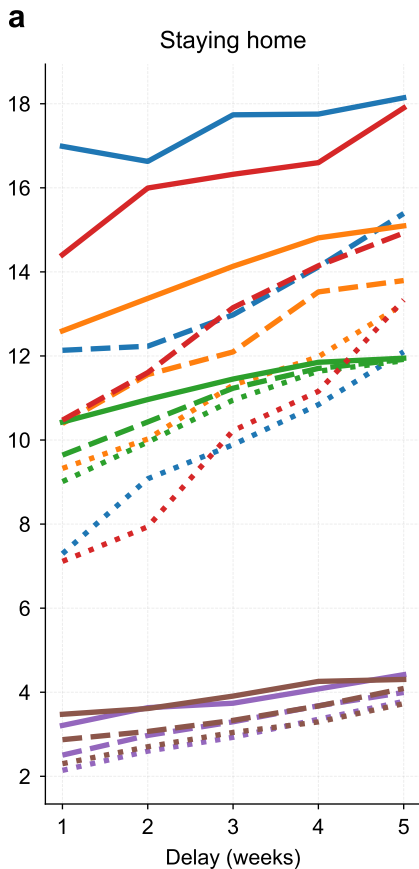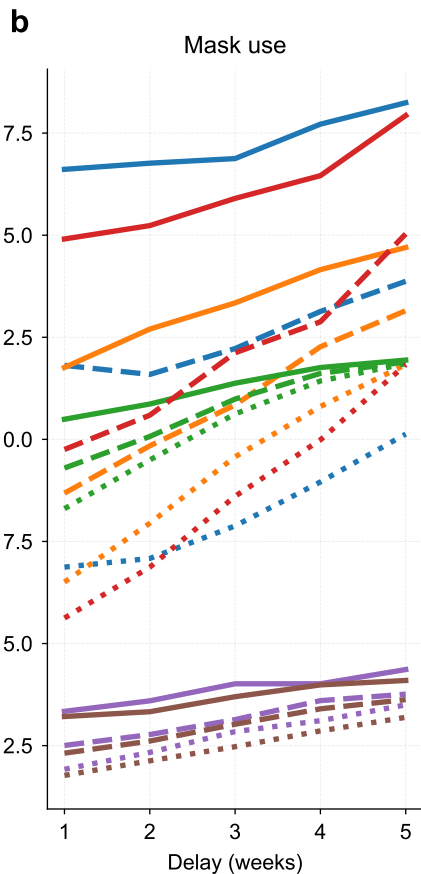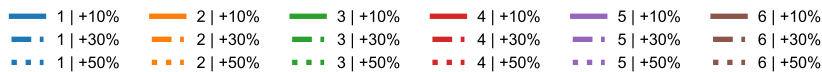

Supplement: Supplementary file 3 [file 429606700c9f24ce9445145c.pdf]

**(A) Absolute reduction in AR (% , per 100,000 vaccinations)**

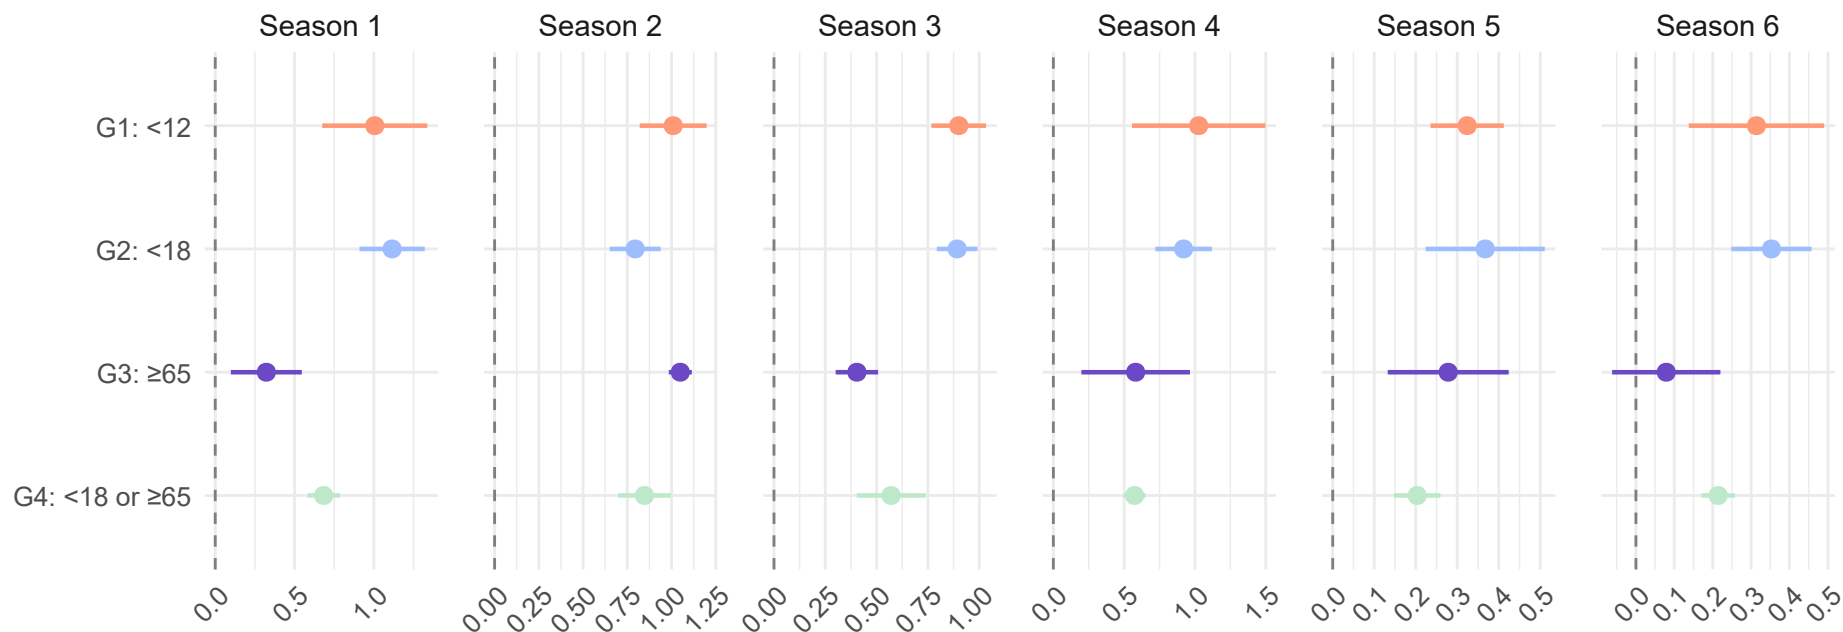

**(B) Relative reduction in AR (% , per 100,000 vaccinations)**

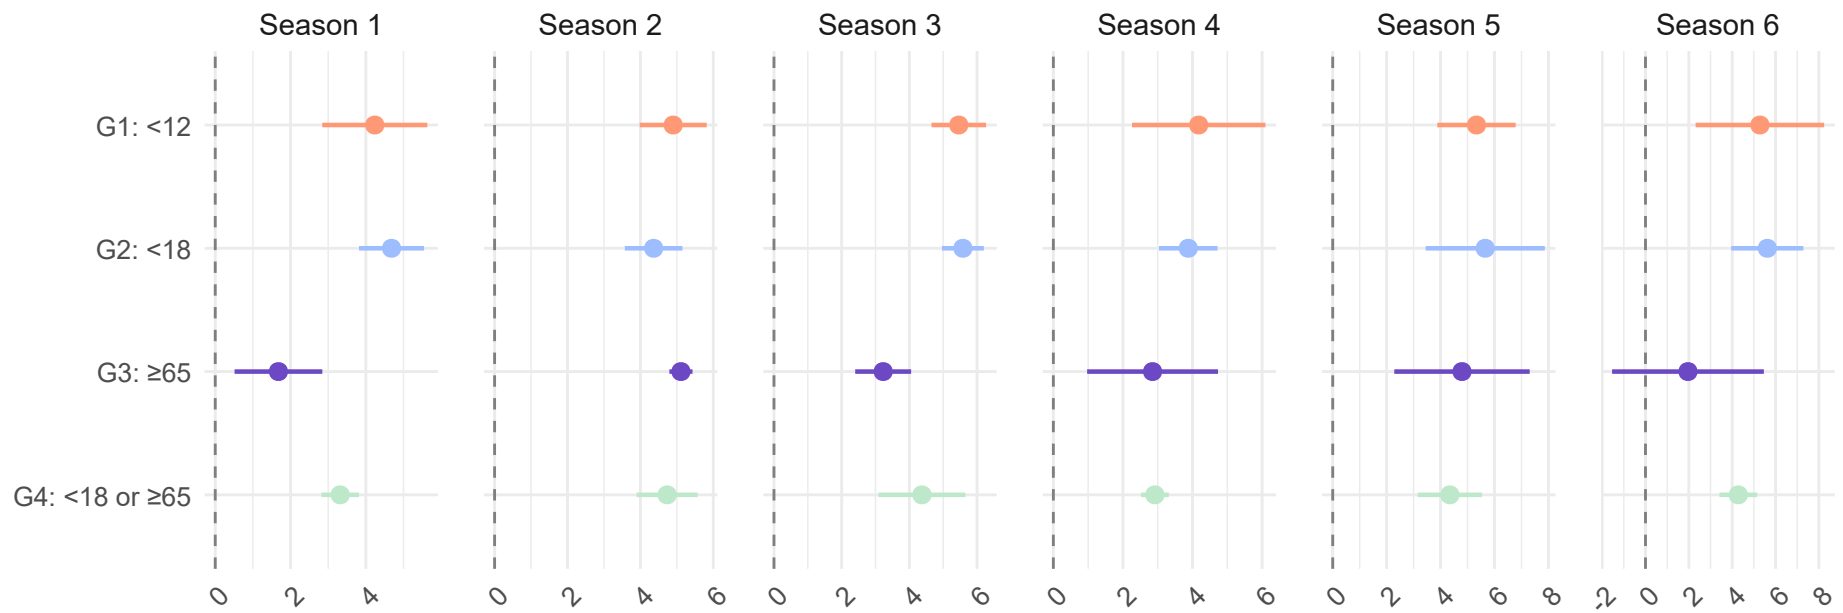

Supplement: Supplementary file 4 [file 4b939b247b5055b7abe51f4b.pdf]

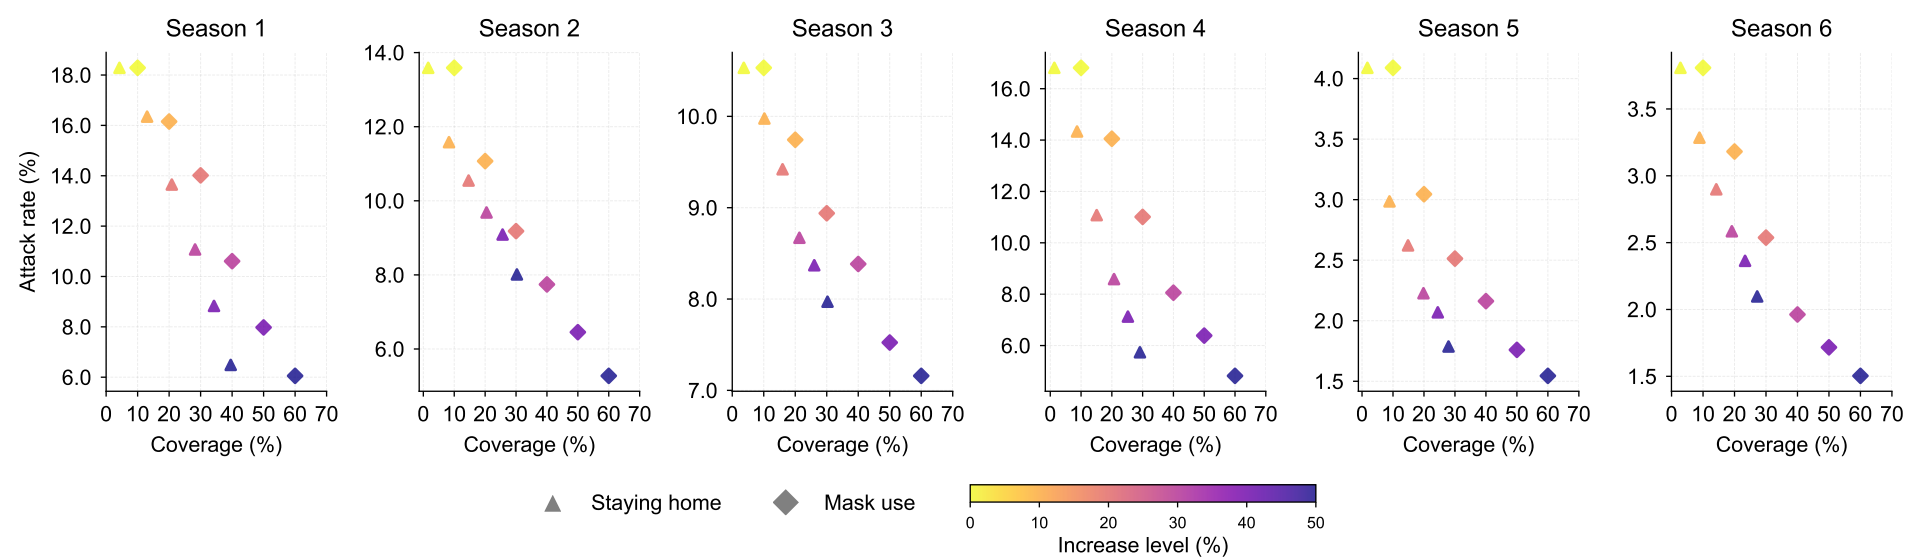

Supplement: Supplementary file 5 [file 6403fb91f474de585914f535.pdf]

**(A)) Absolute reduction in AR (% , per 100,000 vaccinations)**

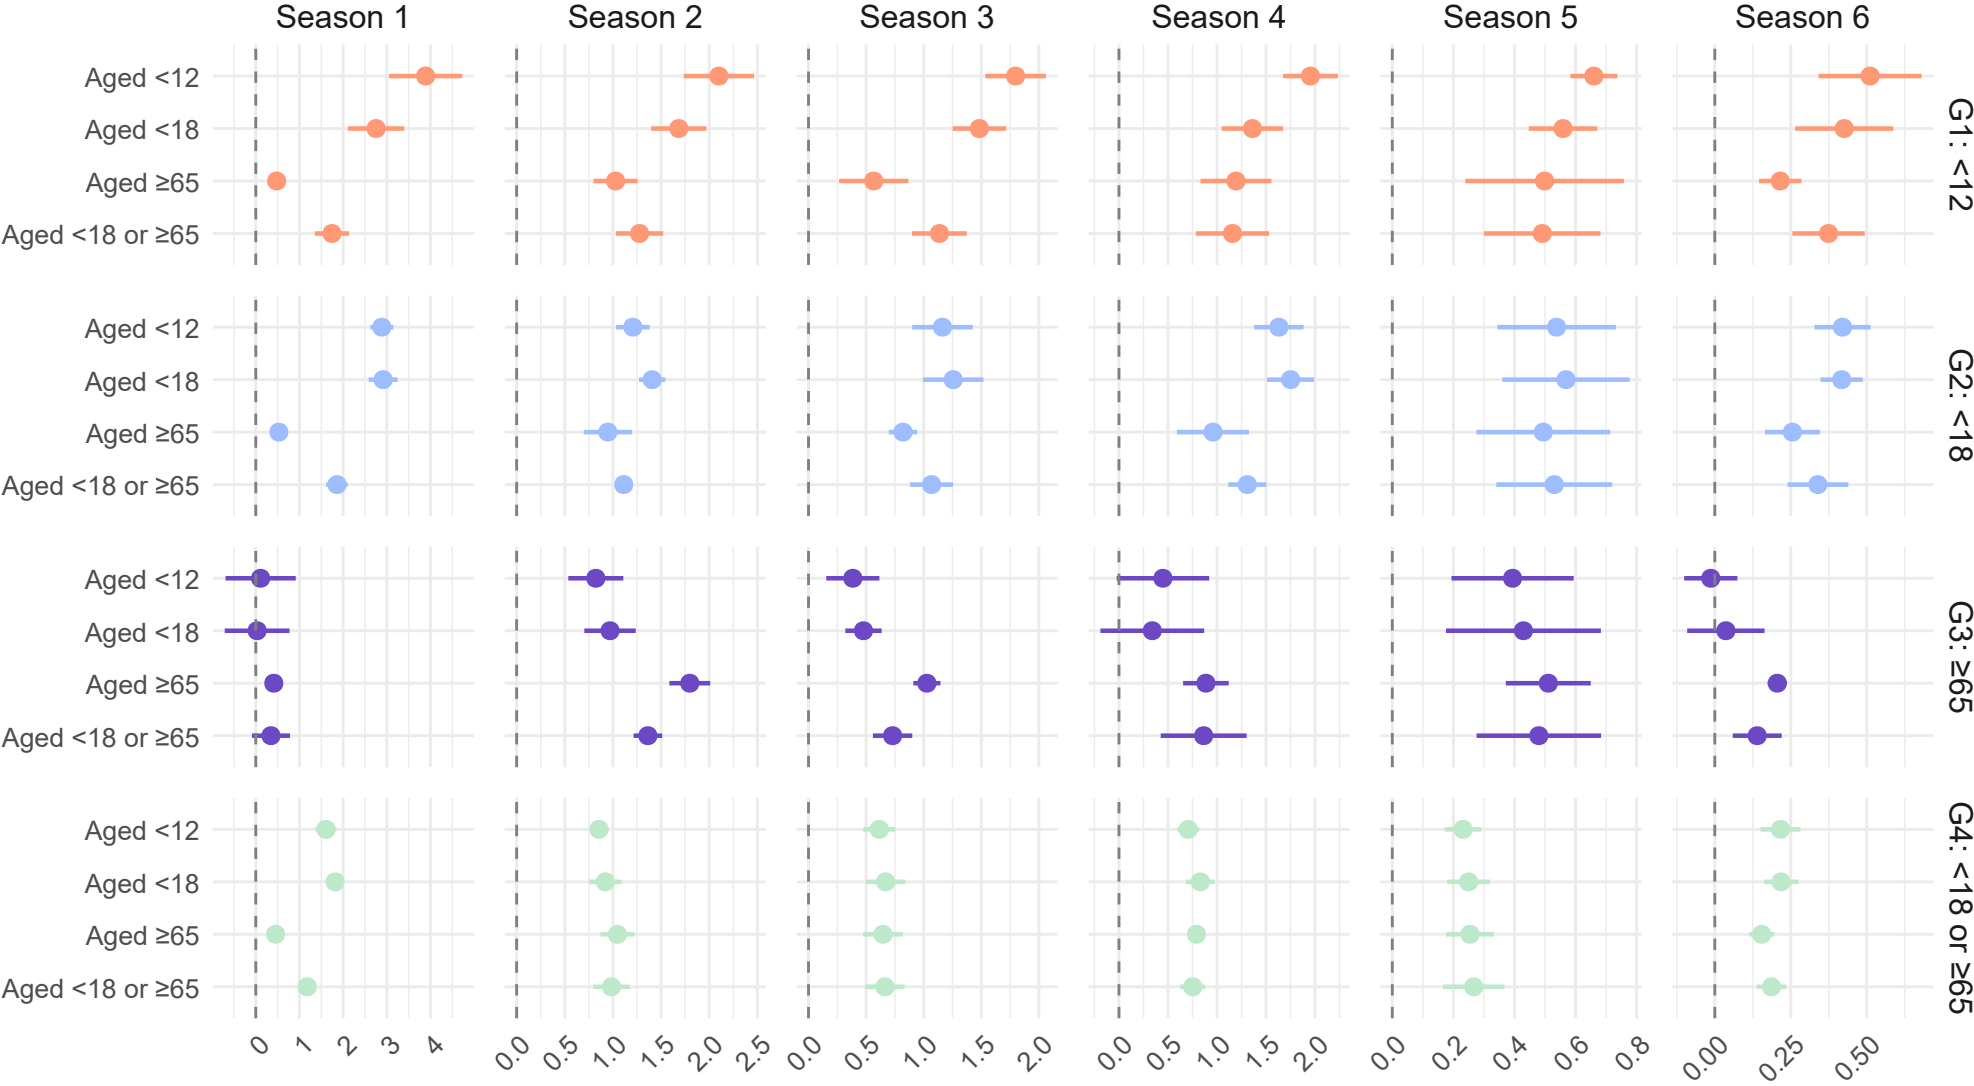

**(B) Relative reduction in AR (% , per 100,000 vaccinations)**

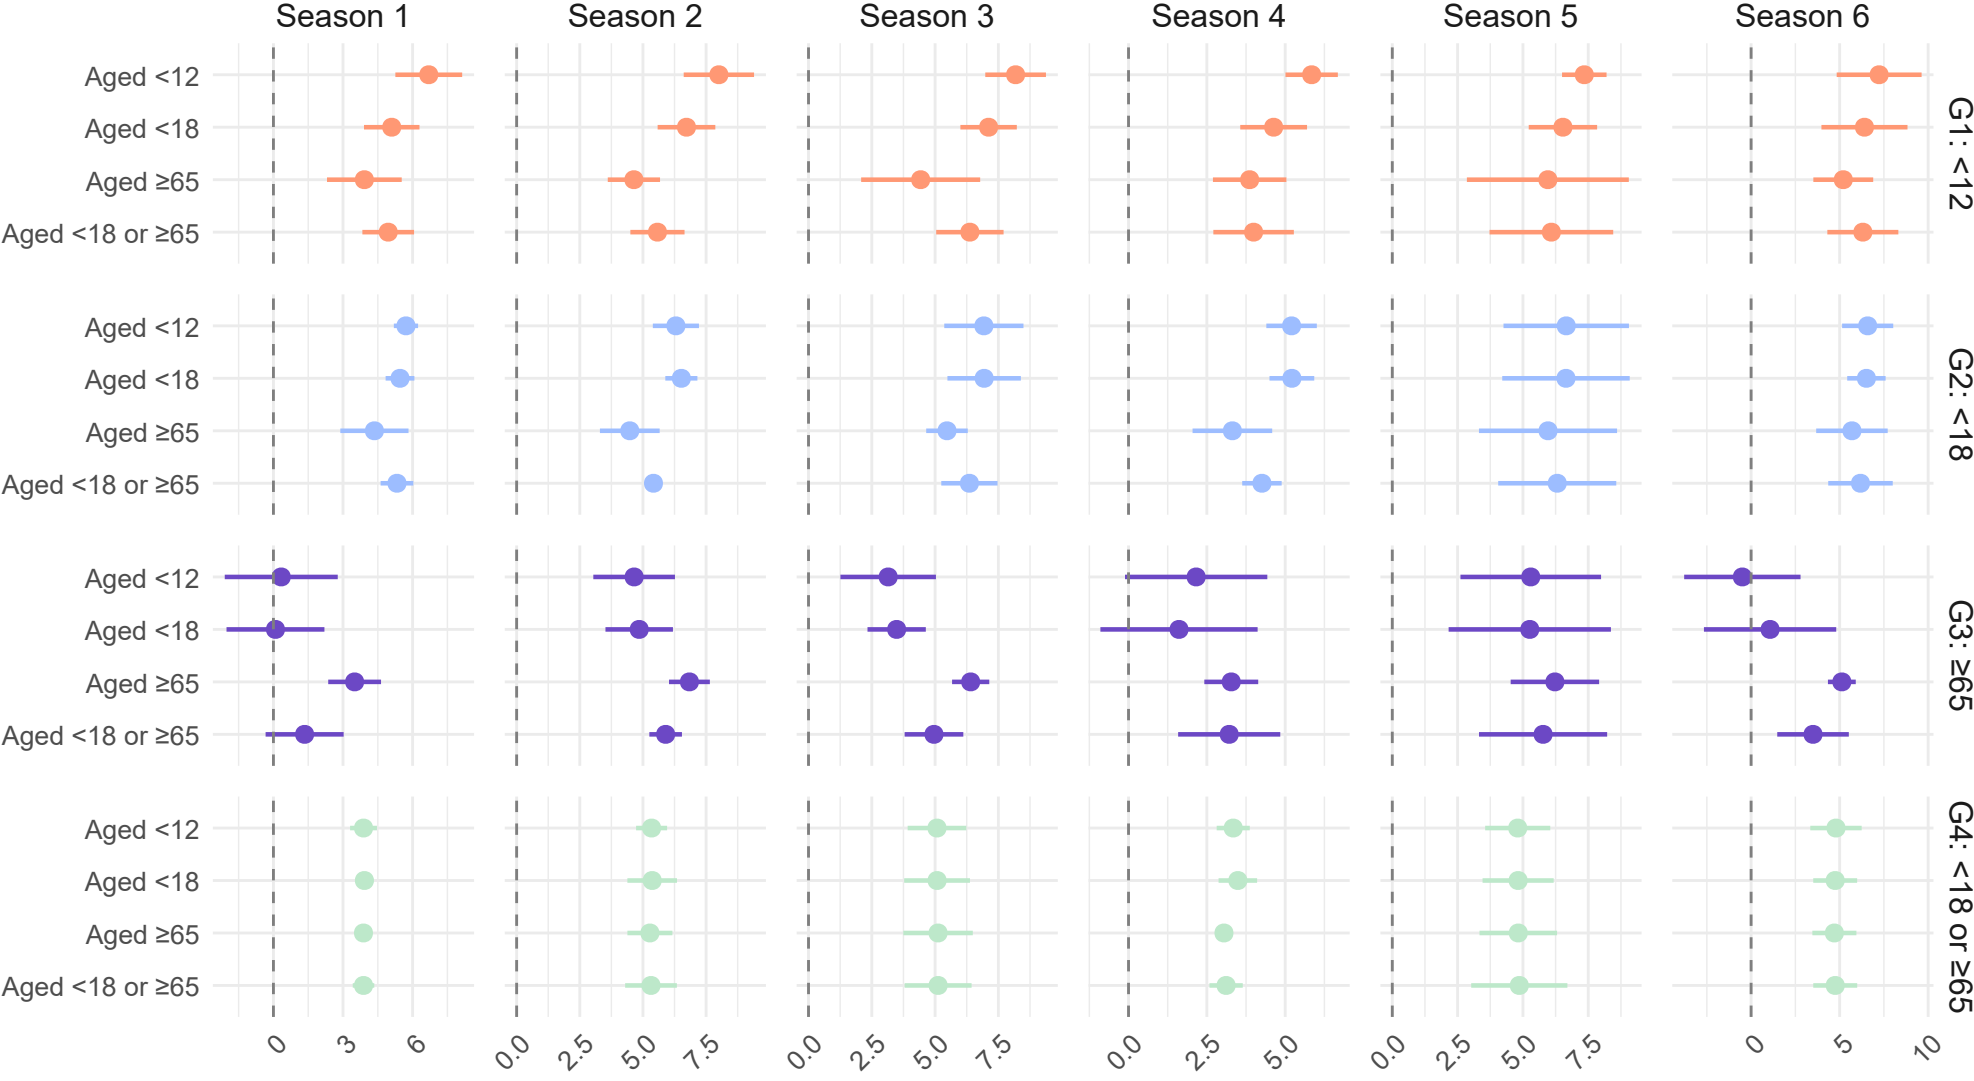

Supplement: Supplementary file 6 [file 7456e35accff25852dc8427c.pdf]

**(A) Absolute reduction in AR (% , per 100,000 vaccinations)**

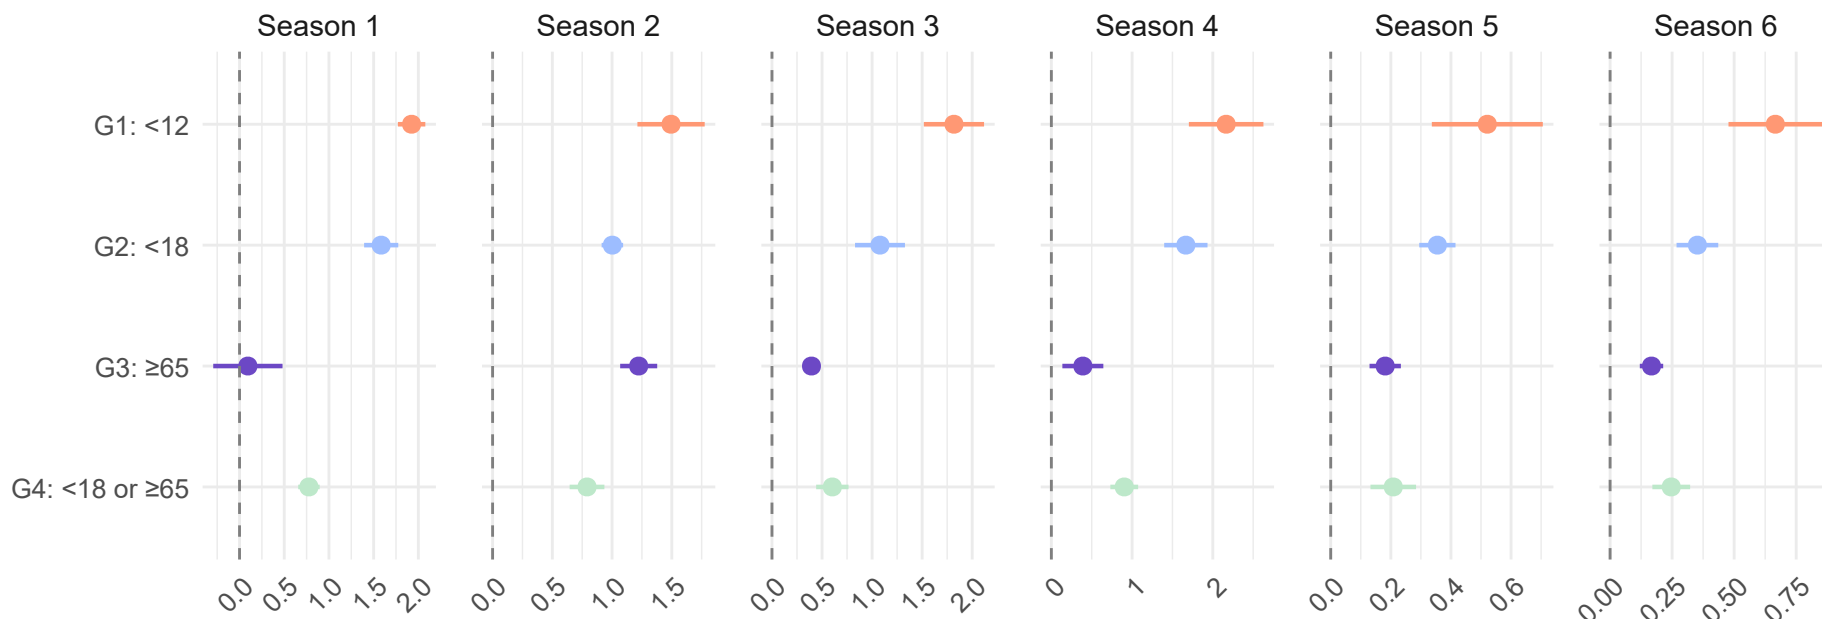

**(B) Relative reduction in AR (% , per 100,000 vaccinations)**

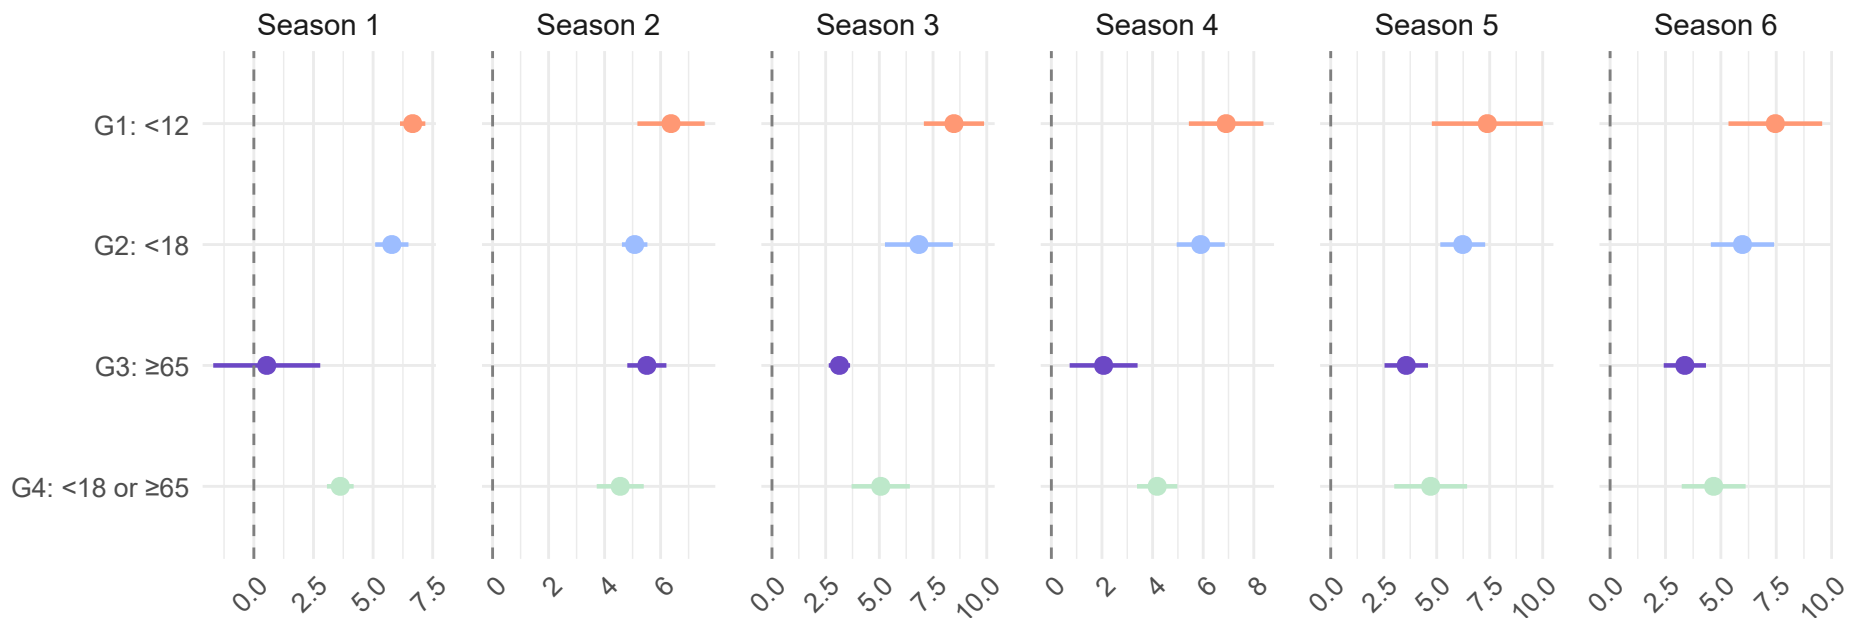

Supplement: Supplementary file 7 [file 9cc1a70e492f4d9302762611.pdf]

**(A)) Absolute reduction in AR (% , per 100,000 vaccinations)**

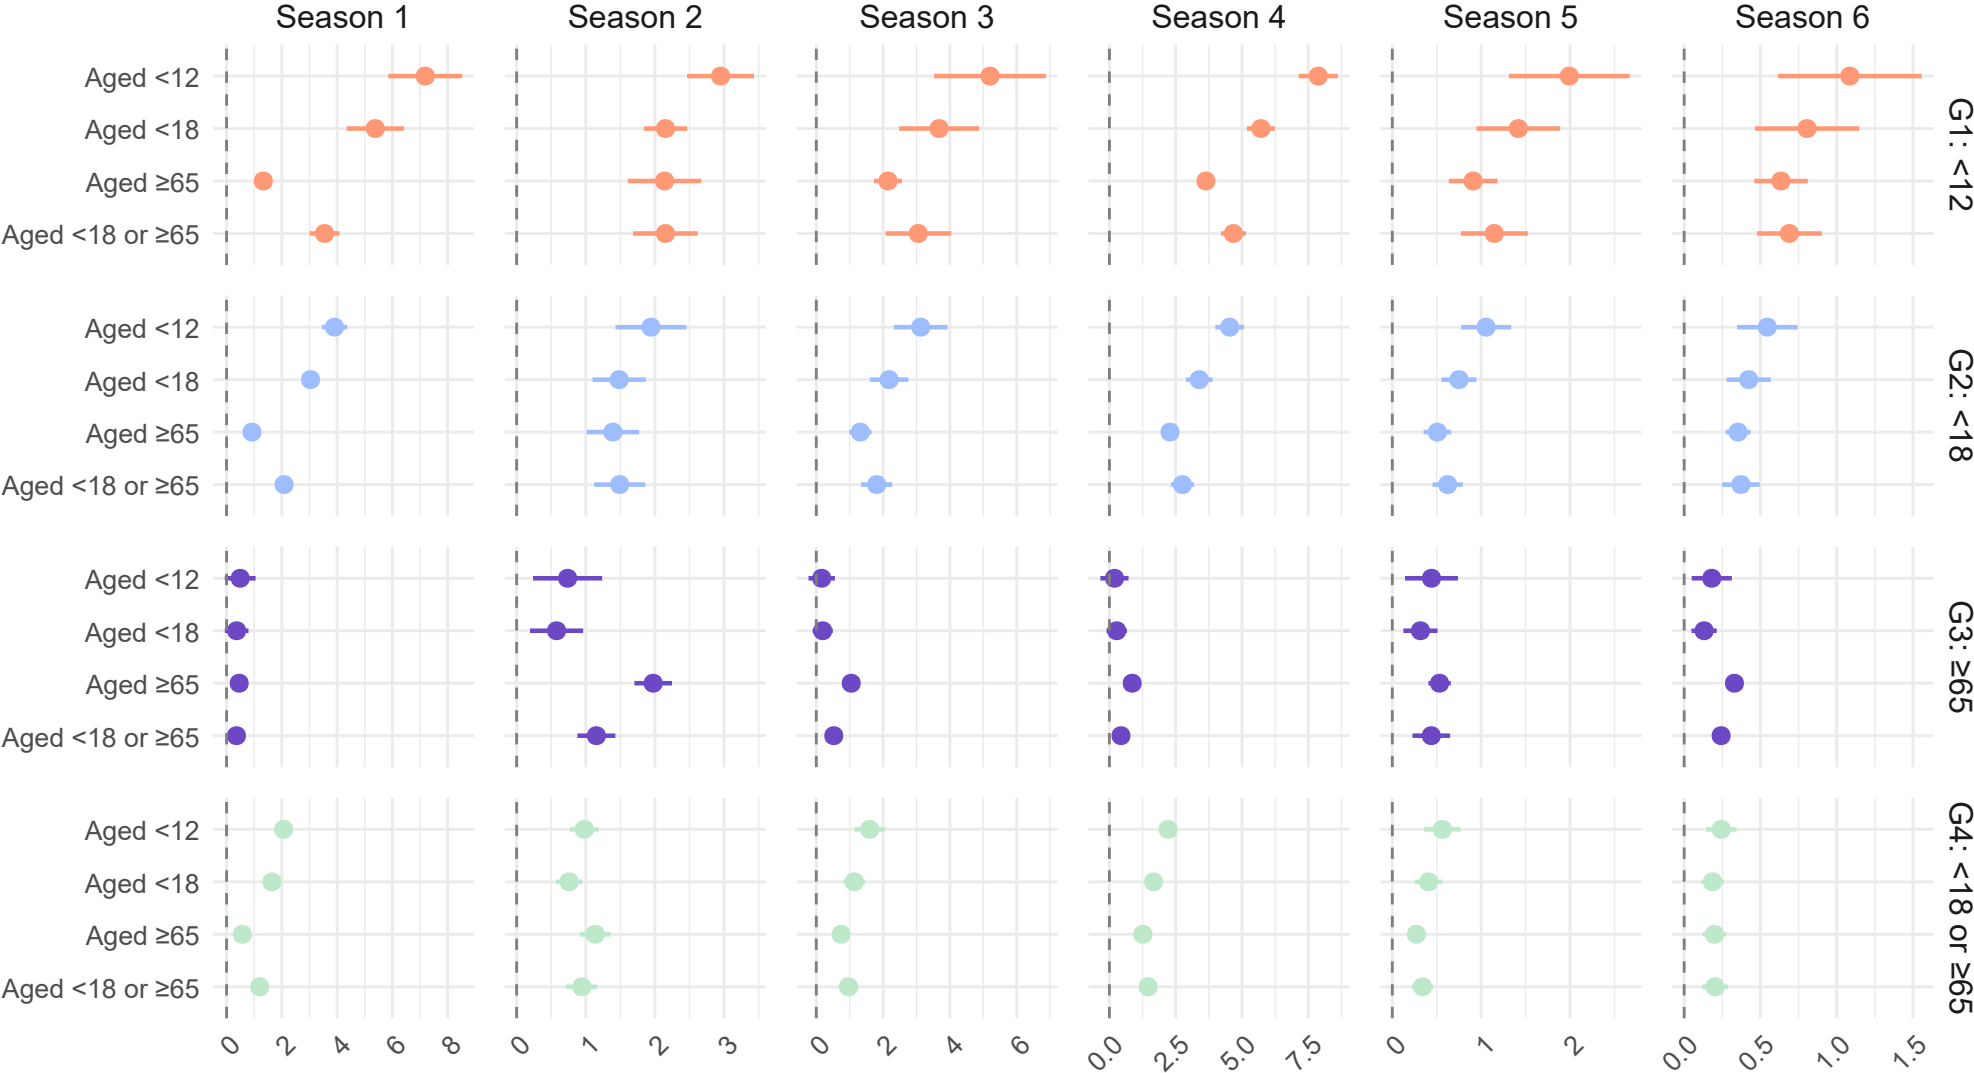

**(B) Relative reduction in AR (% , per 100,000 vaccinations)**

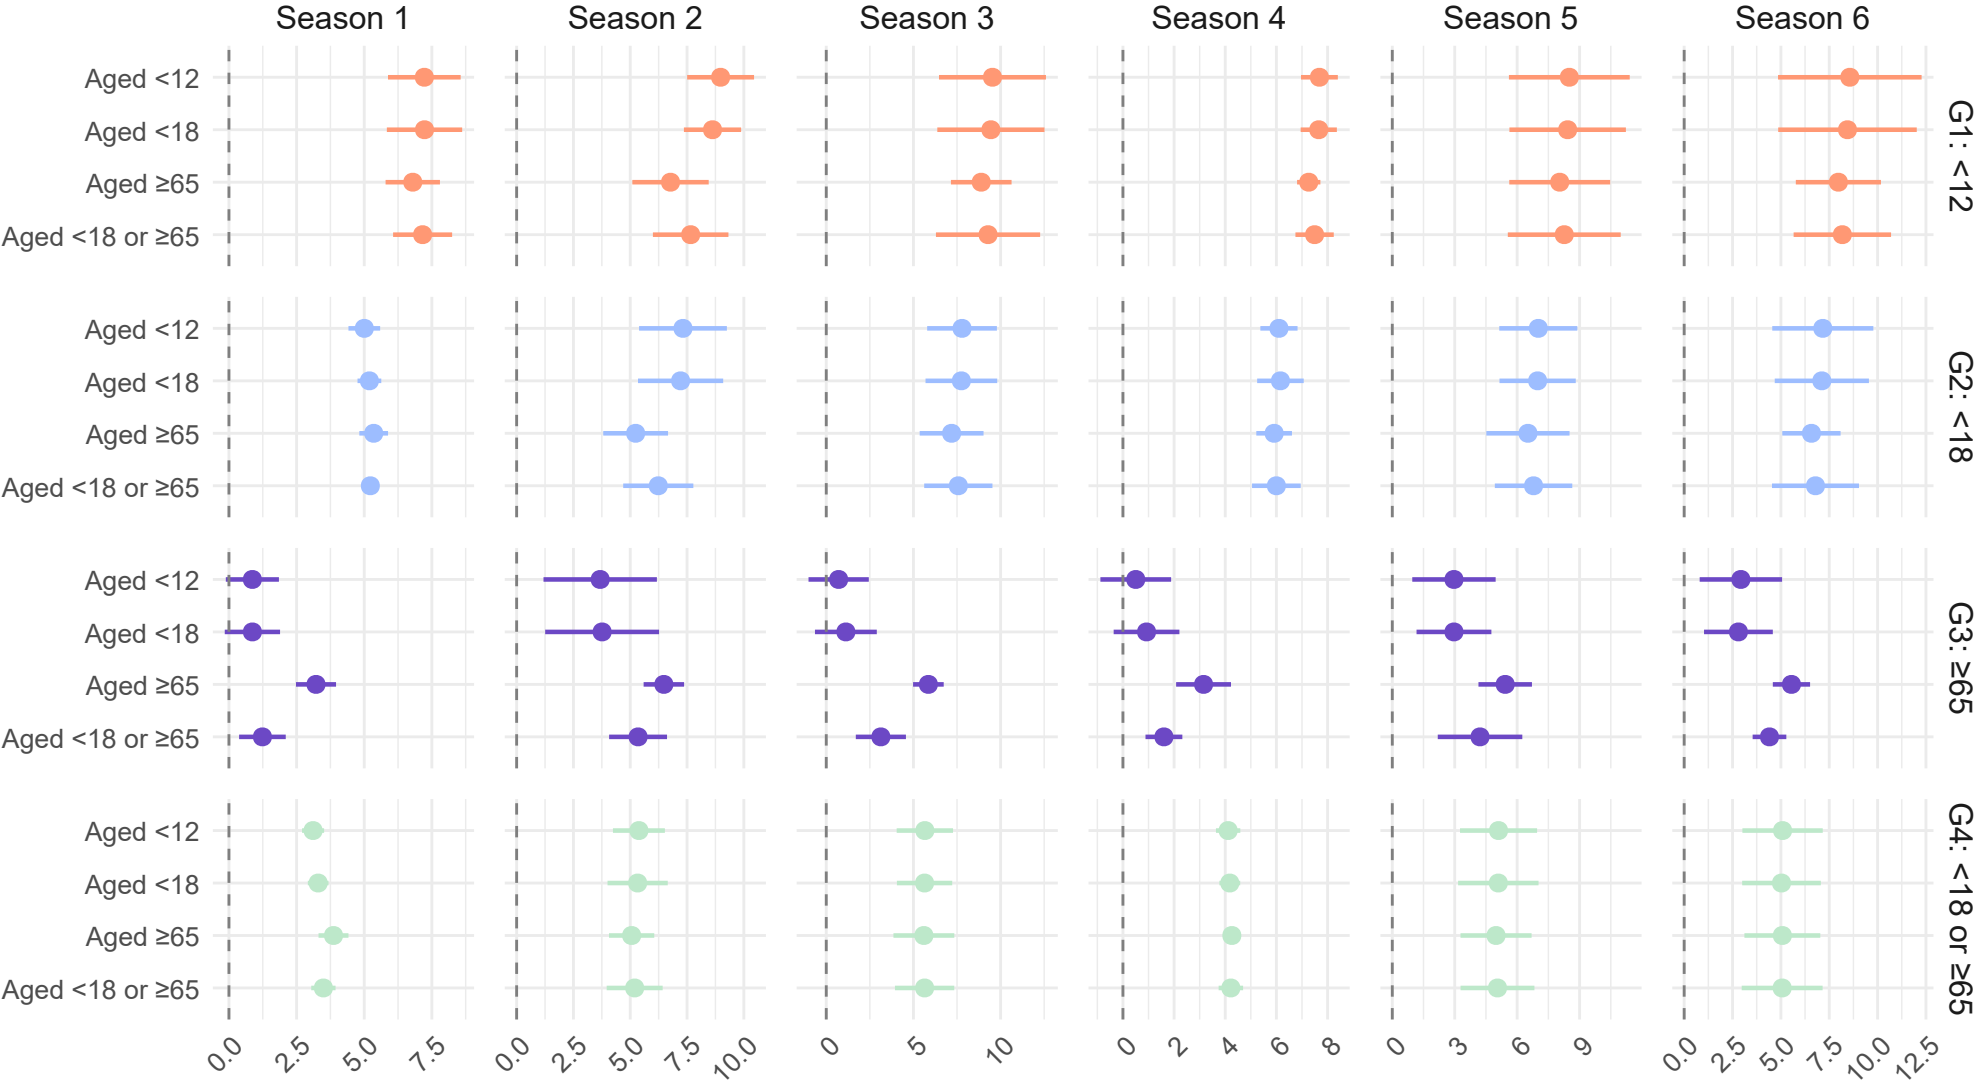

Supplement: Supplementary file 8 [file a130cf93c1fc80f748dcb0e9.pdf]

**(A) Absolute reduction in AR (% , per 100,000 vaccinations)**

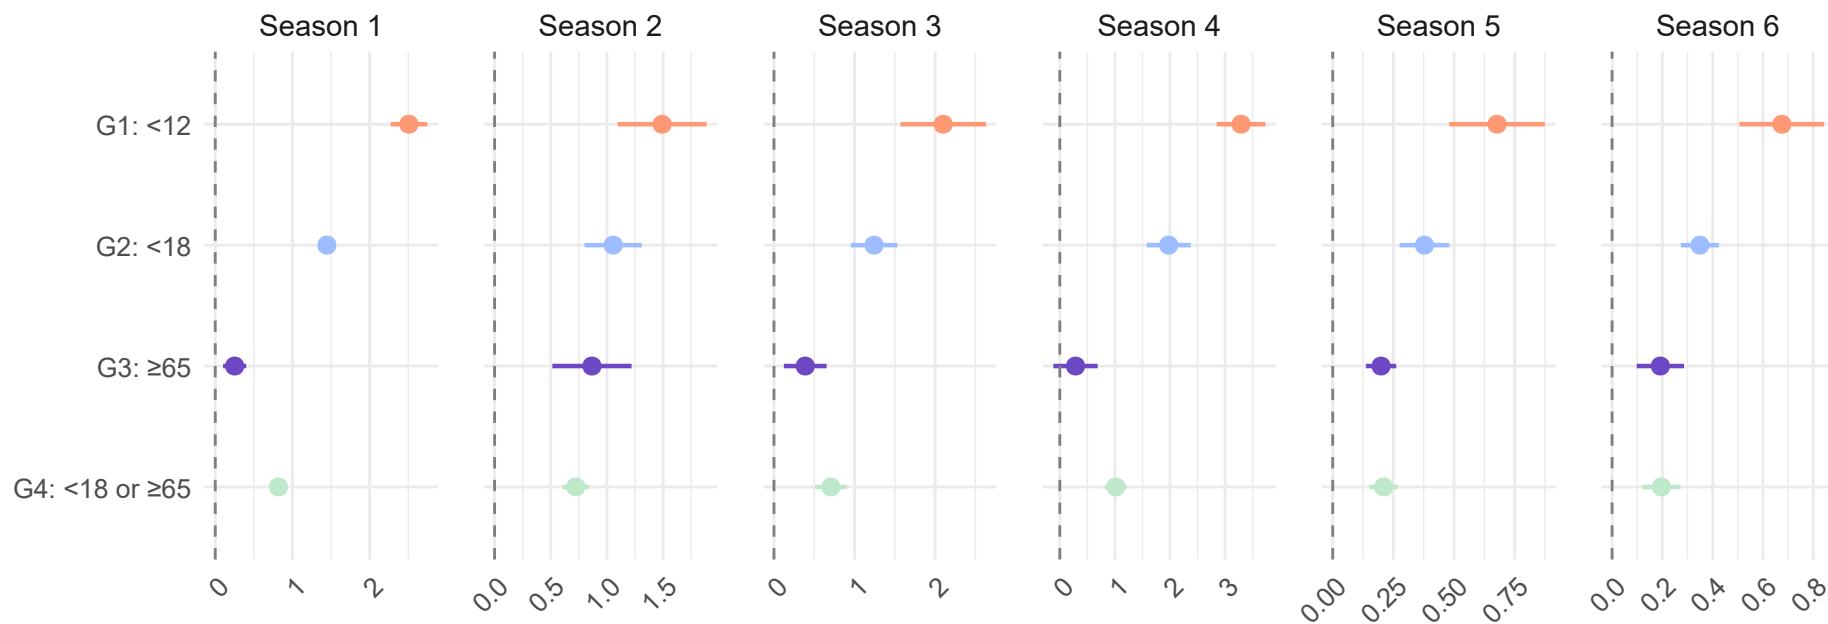

**(B) Relative reduction in AR (% , per 100,000 vaccinations)**

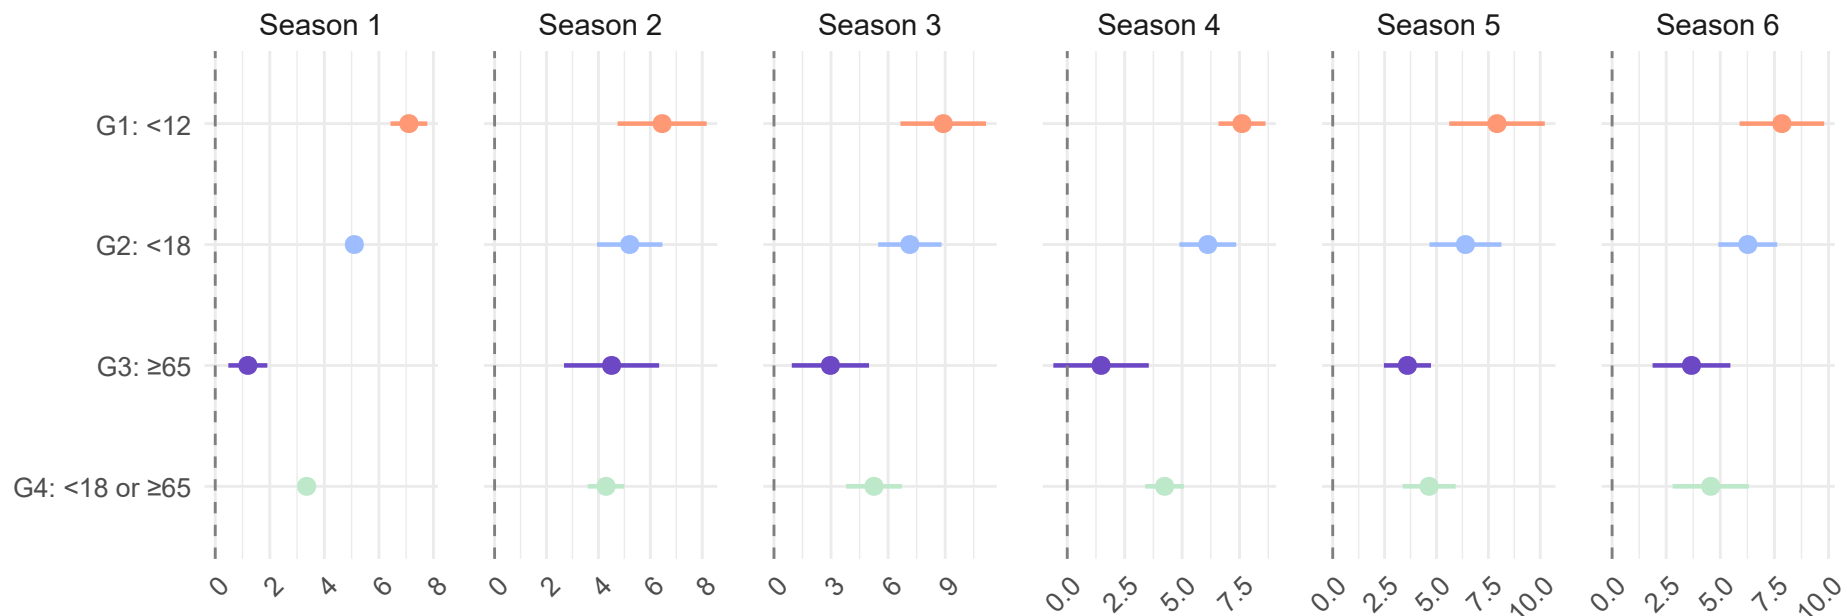

Supplement: Supplementary file 9 [file d36daeb49609c83744e53a70.pdf]
